# Supplementary material for: Engaging inexpensive hands-on activities using Chlamydomonas reinhardtii (a green micro-alga) beads to teach the interplay of photosynthesis and cellular respiration to K4–K16 Biology students
Source: PeerJ. 2020 Aug 25;8:e9817. doi: 10.7717/peerj.9817 (PMC7453928; doi:10.7717/peerj.9817)
Supplement: Data S1 — contains raw pH data with statistical analyses for experiments using Chlamydomonas beads, described in the following figures: Fig. 1, Fig. 2, Fig. 3, Fig. 6, Fig. 7, Fig. 8 & Fig. 9. Data analyses is based on three biological replicates. Each biological replicate had three internal replicates. [file peerj-08-9817-s006.xlsx]

## Sheet: Fig. 1
DI= de-ionized water
pH indicator used: phenol red
pH measured with a pH meter.
Three biological replicates were used in the experiment; each had three internal replicates. The average of three internal replicates is shown in the data.
Replicate #	Control, light, DI water	4A+ beads, light, DI water	t-Test: Paired Two Sample for Means
1	7.1	7.1
2	7.2	7.1		Control, light, DI water	4A+ beads, light, DI water
3	7.2	7.2	Mean	7.16667	7.13333
			Variance	0.00333333	0.00333333
			Observations	3	3
			Pearson Correlation	0.5
			Hypothesized Mean Difference	0
			df	2
			t Stat	1
			P(T<=t) one-tail	0.211325
			t Critical one-tail	2.91999
			P(T<=t) two-tail	0.42265
			t Critical two-tail	4.30265
Replicate #	Control, dark, DI water	4A+ beads, dark, DI water	t-Test: Paired Two Sample for Means
1	7.2	7.1
2	7.2	7.1		Control, dark, DI water	4A+ beads, dark, DI water
3	7.2	7.2	Mean	7.2	7.13333
			Variance	0	0.00333333
			Observations	3	3
			Pearson Correlation	#DIV/0!
			Hypothesized Mean Difference	0
			df	2
			t Stat	2
			P(T<=t) one-tail	0.0917517
			t Critical one-tail	2.91999
			P(T<=t) two-tail	0.183503
			t Critical two-tail	4.30265
Replicate #	Control, light, tap water	4A+ beads, light, tap water	t-Test: Paired Two Sample for Means
1	7.3	8.5
2	7.2	8.3		Control, light, tap water	4A+ beads, light, tap water
3	7.3	8.4	Mean	7.26667	8.4
			Variance	0.00333333	0.01
			Observations	3	3
			Pearson Correlation	0.866025
			Hypothesized Mean Difference	0
			df	2
			t Stat	-34
			P(T<=t) one-tail	0.000431966
			t Critical one-tail	2.91999
			P(T<=t) two-tail	0.000863931
			t Critical two-tail	4.30265
Replicate #	Control, dark, tap water	4A+ beads, dark, tap water	t-Test: Paired Two Sample for Means
1	7.3	6.5
2	7.3	6.4		Control, dark, tap water	4A+ beads, dark, tap water
3	7.2	6.4	Mean	7.26667	6.43333
			Variance	0.00333333	0.00333333
			Observations	3	3
			Pearson Correlation	0.5
			Hypothesized Mean Difference	0
			df	2
			t Stat	25
			P(T<=t) one-tail	0.000798085
			t Critical one-tail	2.91999
			P(T<=t) two-tail	0.00159617
			t Critical two-tail	4.30265
Replicate #	Control, light, DI water	Control, light, tap water	t-Test: Paired Two Sample for Means
1	7.1	7.3
2	7.2	7.2		Control, light, DI water	Control, light, tap water
3	7.2	7.3	Mean	7.16667	7.26667
			Variance	0.00333333	0.00333333
			Observations	3	3
			Pearson Correlation	-0.5
			Hypothesized Mean Difference	0
			df	2
			t Stat	-1.73205
			P(T<=t) one-tail	0.112702
			t Critical one-tail	2.91999
			P(T<=t) two-tail	0.225403
			t Critical two-tail	4.30265
Replicate #	4A+ beads, light, DI water	4A+ beads, light, tap water	t-Test: Paired Two Sample for Means
1	7.1	8.5
2	7.1	8.3		4A+ beads, light, DI water	4A+ beads, light, tap water
3	7.2	8.4	Mean	7.13333	8.4
			Variance	0.00333333	0.01
			Observations	3	3
			Pearson Correlation	0
			Hypothesized Mean Difference	0
			df	2
			t Stat	-19
			P(T<=t) one-tail	0.00137931
			t Critical one-tail	2.91999
			P(T<=t) two-tail	0.00275863
			t Critical two-tail	4.30265
Replicate #	Control, dark, DI water	Control, dark, tap water	t-Test: Paired Two Sample for Means
1	7.2	7.3
2	7.2	7.3		Control, dark, DI water	Control, dark, tap water
3	7.2	7.2	Mean	7.2	7.26667
			Variance	0	0.00333333
			Observations	3	3
			Pearson Correlation	#DIV/0!
			Hypothesized Mean Difference	0
			df	2
			t Stat	-2
			P(T<=t) one-tail	0.0917517
			t Critical one-tail	2.91999
			P(T<=t) two-tail	0.183503
			t Critical two-tail	4.30265
Replicate #	4A+ beads, dark, DI water	4A+ beads, dark, tap water	t-Test: Paired Two Sample for Means
1	7.1	6.5
2	7.1	6.4		4A+ beads, dark, DI water	4A+ beads, dark, tap water
3	7.2	6.4	Mean	7.13333	6.43333
			Variance	0.00333333	0.00333333
			Observations	3	3
			Pearson Correlation	-0.5
			Hypothesized Mean Difference	0
			df	2
			t Stat	12.1244
			P(T<=t) one-tail	0.00336704
			t Critical one-tail	2.91999
			P(T<=t) two-tail	0.00673408
			t Critical two-tail	4.30265
Replicate #	4A+ beads, dark, tap water	4A+ beads, light, tap water	t-Test: Paired Two Sample for Means
1	6.5	8.5
2	6.4	8.3		4A+ beads, dark, tap water	4A+ beads, light, tap water
3	6.4	8.4	Mean	6.43333	8.4
			Variance	0.00333333	0.01
			Observations	3	3
			Pearson Correlation	0.866025
			Hypothesized Mean Difference	0
			df	2
			t Stat	-59
			P(T<=t) one-tail	0.000143575
			t Critical one-tail	2.91999
			P(T<=t) two-tail	0.00028715
			t Critical two-tail	4.30265
Replicate #	4A+ beads, dark, DI water	4A+ beads, light, DI water	t-Test: Paired Two Sample for Means
1	7.1	7.1
2	7.1	7.1		4A+ beads, dark, DI water	4A+ beads, light, DI water
3	7.2	7.2	Mean	7.13333	7.13333
			Variance	0.00333333	0.00333333
			Observations	3	3
			Pearson Correlation	1
			Hypothesized Mean Difference	0
			df	2
			t Stat	#DIV/0!
			P(T<=t) one-tail	#DIV/0!
			t Critical one-tail	#DIV/0!
			P(T<=t) two-tail	#DIV/0!
			t Critical two-tail	#DIV/0!

## Sheet: Fig.2
pH indicator used: phenol red
pH measured with a pH meter.
Three biological replicates were used in the experiment; each had three internal replicates. The average of three internal replicates is shown in the data.
Tap water used
Replicate #	Control for 4A+ 4 x 106 cells/bead set, light	Control for 4A+ 2 x 106 cells/bead, light	t-Test: Paired Two Sample for Means
1	7	7.2
2	7	7.3		Control for 4A+ 4 x 106 cells/bead set, light	Control for 4A+ 2 x 106 cells/bead, light
3	7	7	Mean	7	7.16667
			Variance	0	0.0233333
			Observations	3	3
			Pearson Correlation	#DIV/0!
			Hypothesized Mean Difference	0
			df	2
			t Stat	-1.88982
			P(T<=t) one-tail	0.0996796
			t Critical one-tail	2.91999
			P(T<=t) two-tail	0.199359
			t Critical two-tail	4.30265
Replicate #	Control for 4A+ 4 x 106 cells/bead set, dark	Control for 4A+ 2 x 106 cells/bead, dark	t-Test: Paired Two Sample for Means
1	7.2	7.1
2	7.1	7.2		Control for 4A+ 4 x 106 cells/bead set, dark	Control for 4A+ 2 x 106 cells/bead, dark
3	7	7.1	Mean	7.1	7.13333
			Variance	0.01	0.00333333
			Observations	3	3
			Pearson Correlation	-2.59149e-15
			Hypothesized Mean Difference	0
			df	2
			t Stat	-0.5
			P(T<=t) one-tail	0.333333
			t Critical one-tail	2.91999
			P(T<=t) two-tail	0.666667
			t Critical two-tail	4.30265
Replicate #	4A+ 4 x 106 cells/bead, light	4A+ 2 x 106 cells/bead, light	t-Test: Paired Two Sample for Means
1	6.2	8.4
2	6.2	8.5		4A+ 4 x 106 cells/bead, light	4A+ 2 x 106 cells/bead, light
3	6.1	8.4	Mean	6.16667	8.43333
			Variance	0.00333333	0.00333333
			Observations	3	3
			Pearson Correlation	0.5
			Hypothesized Mean Difference	0
			df	2
			t Stat	-68
			P(T<=t) one-tail	0.000108096
			t Critical one-tail	2.91999
			P(T<=t) two-tail	0.000216193
			t Critical two-tail	4.30265
Replicate #	4A+ 4 x 106 cells/bead, dark	4A+ 2 x 106 cells/bead, dark	t-Test: Paired Two Sample for Means
1	6.1	6.5
2	6	6.5		4A+ 4 x 106 cells/bead, dark	4A+ 2 x 106 cells/bead, dark
3	6.1	6.4	Mean	6.06667	6.46667
			Variance	0.00333333	0.00333333
			Observations	3	3
			Pearson Correlation	-0.5
			Hypothesized Mean Difference	0
			df	2
			t Stat	-6.9282
			P(T<=t) one-tail	0.0101021
			t Critical one-tail	2.91999
			P(T<=t) two-tail	0.0202041
			t Critical two-tail	4.30265
Replicate #	4A+ 4 x 106 cells/bead, light	4A+ 4 x 106 cells/bead, dark	t-Test: Paired Two Sample for Means
1	6.2	6.1
2	6.2	6		4A+ 4 x 106 cells/bead, light	4A+ 4 x 106 cells/bead, dark
3	6.1	6.1	Mean	6.16667	6.06667
			Variance	0.00333333	0.00333333
			Observations	3	3
			Pearson Correlation	-0.5
			Hypothesized Mean Difference	0
			df	2
			t Stat	1.73205
			P(T<=t) one-tail	0.112702
			t Critical one-tail	2.91999
			P(T<=t) two-tail	0.225403
			t Critical two-tail	4.30265
Replicate #	4A+ 2 x 106 cells/bead, light	4A+ 4 x 106 cells/bead, dark	t-Test: Paired Two Sample for Means
1	8.4	6.5
2	8.5	6.5		4A+ 2 x 106 cells/bead, light	4A+ 4 x 106 cells/bead, dark
3	8.4	6.4	Mean	8.43333	6.46667
			Variance	0.00333333	0.00333333
			Observations	3	3
			Pearson Correlation	0.5
			Hypothesized Mean Difference	0
			df	2
			t Stat	59
			P(T<=t) one-tail	0.000143575
			t Critical one-tail	2.91999
			P(T<=t) two-tail	0.00028715
			t Critical two-tail	4.30265

## Sheet: Fig. 3
pH indicator used: bicarbonate indicator; pH measured with pH testing strips
Three biological replicates were used in the experiment; each had three internal replicates. The average of three internal replicates is shown in the data.
Tap water used
Replicate #	Control bracelet	Dark-exposed 4A+ algal bracelet	t-Test: Paired Two Sample for Means
1	7	6
2	7	6.5		Control bracelet	Dark-exposed 4A+ algal bracelet
3	7	6	Mean	7	6.16667
			Variance	0	0.0833333
			Observations	3	3
			Pearson Correlation	#DIV/0!
			Hypothesized Mean Difference	0
			df	2
			t Stat	5
			P(T<=t) one-tail	0.0188748
			t Critical one-tail	2.91999
			P(T<=t) two-tail	0.0377496
			t Critical two-tail	4.30265
Replicate #	Control bracelet	Light-exposed 4A+ algal bracelet	t-Test: Paired Two Sample for Means
1	7	8.5
2	7	9		Control bracelet	Light-exposed 4A+ algal bracelet
3	7	9	Mean	7	8.83333
			Variance	0	0.0833333
			Observations	3	3
			Pearson Correlation	#DIV/0!
			Hypothesized Mean Difference	0
			df	2
			t Stat	-11
			P(T<=t) one-tail	0.0040817
			t Critical one-tail	2.91999
			P(T<=t) two-tail	0.0081634
			t Critical two-tail	4.30265
Replicate #	Dark-exposed 4A+ algal bracelet	Light-exposed 4A+ algal bracelet	t-Test: Paired Two Sample for Means
1	6	8.5
2	6.5	9		Dark-exposed 4A+ algal bracelet	Light-exposed 4A+ algal bracelet
3	6	9	Mean	6.16667	8.83333
			Variance	0.0833333	0.0833333
			Observations	3	3
			Pearson Correlation	0.5
			Hypothesized Mean Difference	0
			df	2
			t Stat	-16
			P(T<=t) one-tail	0.00194175
			t Critical one-tail	2.91999
			P(T<=t) two-tail	0.00388351
			t Critical two-tail	4.30265

## Sheet: Fig.6
pH indicator used: bicarbonate indicator
Three biological replicates were used in the experiment; each had three internal replicates. The average of three internal replicates is shown in the data.
pH measured with pH testing strips
Tap water used
Replicate #	9 hour-dark-exposed 4A+ algal bracelet	15 hour-dark-exposed 4A+ algal bracelet	t-Test: Paired Two Sample for Means
1	6	6
2	6	5.5		9 hour-dark-exposed 4A+ algal bracelet	15 hour-dark-exposed 4A+ algal bracelet
3	6	5	Mean	6	5.5
			Variance	0	0.25
			Observations	3	3
			Pearson Correlation	#DIV/0!
			Hypothesized Mean Difference	0
			df	2
			t Stat	1.73205
			P(T<=t) one-tail	0.112702
			t Critical one-tail	2.91999
			P(T<=t) two-tail	0.225403
			t Critical two-tail	4.30265
Replicate #	9 hour-dark-exposed 4A+ algal bracelet	9 hour-dark-exposed 4A+ algal bracelet exposed to light for four hours	t-Test: Paired Two Sample for Means
1	6	8.5
2	6	8.5		9 hour-dark-exposed 4A+ algal bracelet	9 hour-dark-exposed 4A+ algal bracelet exposed to light for four hours
3	6	9	Mean	6	8.66667
			Variance	0	0.0833333
			Observations	3	3
			Pearson Correlation	#DIV/0!
			Hypothesized Mean Difference	0
			df	2
			t Stat	-16
			P(T<=t) one-tail	0.00194175
			t Critical one-tail	2.91999
			P(T<=t) two-tail	0.00388351
			t Critical two-tail	4.30265
Replicate #	15 hour-dark-exposed 4A+ algal bracelet	15 hour-dark-exposed 4A+ algal bracelet exposed to light for 12 hours	t-Test: Paired Two Sample for Means
1	6	6
2	5.5	6.5		15 hour-dark-exposed 4A+ algal bracelet	15 hour-dark-exposed 4A+ algal bracelet exposed to light for 12 hours
3	5.5	6.5	Mean	5.66667	6.33333
			Variance	0.0833333	0.0833333
			Observations	3	3
			Pearson Correlation	-1
			Hypothesized Mean Difference	0
			df	2
			t Stat	-2
			P(T<=t) one-tail	0.0917517
			t Critical one-tail	2.91999
			P(T<=t) two-tail	0.183503
			t Critical two-tail	4.30265
Replicate #	9 hour-dark-exposed 4A+ algal bracelet exposed to light for four hours	15 hour-dark-exposed 4A+ algal bracelet exposed to light for 12 hours	t-Test: Paired Two Sample for Means
1	8.5	6
2	8.5	6.5		9 hour-dark-exposed 4A+ algal bracelet exposed to light for four hours	15 hour-dark-exposed 4A+ algal bracelet exposed to light for 12 hours
3	9	6.5	Mean	8.66667	6.33333
			Variance	0.0833333	0.0833333
			Observations	3	3
			Pearson Correlation	0.5
			Hypothesized Mean Difference	0
			df	2
			t Stat	14
			P(T<=t) one-tail	0.00253166
			t Critical one-tail	2.91999
			P(T<=t) two-tail	0.00506332
			t Critical two-tail	4.30265

## Sheet: Fig.7
pH indicator used: phenol red
pH measured with a pH meter.
Three biological replicates were used in the experiment; each had three internal replicates. The average of three internal replicates is shown in the data.
Tap water used
Replicate #	Control before light shift	Control after 30 minutes of light exposure	t-Test: Paired Two Sample for Means
1	7.3	7.3
2	7.3	7.2		Control before light shift	Control after 30 minutes of light exposure
3	7.2	7.2	Mean	7.26667	7.23333
			Variance	0.00333333	0.00333333
			Observations	3	3
			Pearson Correlation	0.5
			Hypothesized Mean Difference	0
			df	2
			t Stat	1
			P(T<=t) one-tail	0.211325
			t Critical one-tail	2.91999
			P(T<=t) two-tail	0.42265
			t Critical two-tail	4.30265
Replicate #	Control before light shift	Control after 1 hour of light exposure	t-Test: Paired Two Sample for Means
1	7.3	7.3
2	7.3	7.4		Control before light shift	Control after 1 hour of light exposure
3	7.2	7.3	Mean	7.26667	7.33333
			Variance	0.00333333	0.00333333
			Observations	3	3
			Pearson Correlation	0.5
			Hypothesized Mean Difference	0
			df	2
			t Stat	-2
			P(T<=t) one-tail	0.0917517
			t Critical one-tail	2.91999
			P(T<=t) two-tail	0.183503
			t Critical two-tail	4.30265
Replicate #	Control before dark shift	Control after 30 minutes of dark exposure	t-Test: Paired Two Sample for Means
1	7.2	7
2	7.3	7.2		Control before dark shift	Control after 30 minutes of dark exposure
3	7.1	7.1	Mean	7.2	7.1
			Variance	0.01	0.01
			Observations	3	3
			Pearson Correlation	0.5
			Hypothesized Mean Difference	0
			df	2
			t Stat	1.73205
			P(T<=t) one-tail	0.112702
			t Critical one-tail	2.91999
			P(T<=t) two-tail	0.225403
			t Critical two-tail	4.30265
Replicate #	Control before dark shift	Control after 1 hour of dark exposure	t-Test: Paired Two Sample for Means
1	7.2	7.1
2	7.3	7.1		Control before dark shift	Control after 1 hour of dark exposure
3	7.1	7.2	Mean	7.2	7.13333
			Variance	0.01	0.00333333
			Observations	3	3
			Pearson Correlation	-0.866025
			Hypothesized Mean Difference	0
			df	2
			t Stat	0.755929
			P(T<=t) one-tail	0.264298
			t Critical one-tail	2.91999
			P(T<=t) two-tail	0.528595
			t Critical two-tail	4.30265
Replicate #	10E35 before light shift	4A+ before light shift	t-Test: Paired Two Sample for Means
1	6.7	7
2	6.7	7.2		10E35 before light shift	4A+ before light shift
3	6.8	7.1	Mean	6.73333	7.1
			Variance	0.00333333	0.01
			Observations	3	3
			Pearson Correlation	-2.5339e-15
			Hypothesized Mean Difference	0
			df	2
			t Stat	-5.5
			P(T<=t) one-tail	0.015752
			t Critical one-tail	2.91999
			P(T<=t) two-tail	0.031504
			t Critical two-tail	4.30265
Replicate #	10E35 after 30 minutes of light exposure	4A+ after 30 minutes of light exposure	t-Test: Paired Two Sample for Means
1	6.9	7.6
2	6.9	7.6		10E35 after 30 minutes of light exposure	4A+ after 30 minutes of light exposure
3	6.8	7.7	Mean	6.86667	7.63333
			Variance	0.00333333	0.00333333
			Observations	3	3
			Pearson Correlation	-1
			Hypothesized Mean Difference	0
			df	2
			t Stat	-11.5
			P(T<=t) one-tail	0.00373837
			t Critical one-tail	2.91999
			P(T<=t) two-tail	0.00747674
			t Critical two-tail	4.30265
Replicate #	10E35 after 1 hour of light exposure	4A+ after 1 hour of light exposure	t-Test: Paired Two Sample for Means
1	7.5	8.7
2	7.6	8.8		10E35 after 1 hour of light exposure	4A+ after 1 hour of light exposure
3	7.6	8.8	Mean	7.56667	8.76667
			Variance	0.00333333	0.00333333
			Observations	3	3
			Pearson Correlation	1
			Hypothesized Mean Difference	0
			df	2
			t Stat	-9.86295e+07
			P(T<=t) one-tail	5.13992e-17
			t Critical one-tail	2.91999
			P(T<=t) two-tail	1.02798e-16
			t Critical two-tail	4.30265
Replicate #	10E35 before dark shift	4A+ before dark shift	t-Test: Paired Two Sample for Means
1	6.7	7
2	6.8	7.1		10E35 before dark shift	4A+ before dark shift
3	6.9	7.1	Mean	6.8	7.06667
			Variance	0.01	0.00333333
			Observations	3	3
			Pearson Correlation	0.866025
			Hypothesized Mean Difference	0
			df	2
			t Stat	-8
			P(T<=t) one-tail	0.00763404
			t Critical one-tail	2.91999
			P(T<=t) two-tail	0.0152681
			t Critical two-tail	4.30265
Replicate #	10E35 after 30 minutes of dark exposure	4A+ after 30 minutes of dark exposure	t-Test: Paired Two Sample for Means
1	6.5	7
2	6.5	7		10E35 after 30 minutes of dark exposure	4A+ after 30 minutes of dark exposure
3	6.6	6.9	Mean	6.53333	6.96667
			Variance	0.00333333	0.00333333
			Observations	3	3
			Pearson Correlation	-1
			Hypothesized Mean Difference	0
			df	2
			t Stat	-6.5
			P(T<=t) one-tail	0.0114301
			t Critical one-tail	2.91999
			P(T<=t) two-tail	0.0228602
			t Critical two-tail	4.30265
Replicate #	10E35 after 1 hour of dark exposure	4A+ after 1 hour of dark exposure	t-Test: Paired Two Sample for Means
1	6.4	6.8
2	6.3	6.7		10E35 after 1 hour of dark exposure	4A+ after 1 hour of dark exposure
3	6.3	6.8	Mean	6.33333	6.76667
			Variance	0.00333333	0.00333333
			Observations	3	3
			Pearson Correlation	0.5
			Hypothesized Mean Difference	0
			df	2
			t Stat	-13
			P(T<=t) one-tail	0.00293258
			t Critical one-tail	2.91999
			P(T<=t) two-tail	0.00586515
			t Critical two-tail	4.30265

## Sheet: Fig. 8
pH indicator used: phenol red
pH measured with a pH meter.
Three biological replicates were used in the experiment; each had three internal replicates. The average of three internal replicates is shown in the data.
Tap water used
Replicate #	Control before dark shift	Control after 15 minutes of dark exposure	t-Test: Paired Two Sample for Means
1	7.3	7.4
2	7.4	7.3		Control before dark shift	Control after 15 minutes of dark exposure
3	7.4	7.3	Mean	7.36667	7.33333
			Variance	0.00333333	0.00333333
			Observations	3	3
			Pearson Correlation	-1
			Hypothesized Mean Difference	0
			df	2
			t Stat	0.5
			P(T<=t) one-tail	0.333333
			t Critical one-tail	2.91999
			P(T<=t) two-tail	0.666667
			t Critical two-tail	4.30265
Replicate #	Control before dark shift	Control after 30 minutes of dark exposure	t-Test: Paired Two Sample for Means
1	7.3	7.4
2	7.4	7.4		Control before dark shift	Control after 30 minutes of dark exposure
3	7.4	7.3	Mean	7.36667	7.36667
			Variance	0.00333333	0.00333333
			Observations	3	3
			Pearson Correlation	-0.5
			Hypothesized Mean Difference	0
			df	2
			t Stat	0
			P(T<=t) one-tail	0.5
			t Critical one-tail	2.91999
			P(T<=t) two-tail	1
			t Critical two-tail	4.30265
Replicate #	Control before dark shift	Control after 45 minutes of dark exposure	t-Test: Paired Two Sample for Means
1	7.3	7.4
2	7.4	7.3		Control before dark shift	Control after 45 minutes of dark exposure
3	7.4	7.3	Mean	7.36667	7.33333
			Variance	0.00333333	0.00333333
			Observations	3	3
			Pearson Correlation	-1
			Hypothesized Mean Difference	0
			df	2
			t Stat	0.5
			P(T<=t) one-tail	0.333333
			t Critical one-tail	2.91999
			P(T<=t) two-tail	0.666667
			t Critical two-tail	4.30265
Replicate #	Control before dark shift	Control after 1 hour of dark exposure	t-Test: Paired Two Sample for Means
1	7.3	7.4
2	7.4	7.3		Control before dark shift	Control after 1 hour of dark exposure
3	7.4	7.3	Mean	7.36667	7.33333
			Variance	0.00333333	0.00333333
			Observations	3	3
			Pearson Correlation	-1
			Hypothesized Mean Difference	0
			df	2
			t Stat	0.5
			P(T<=t) one-tail	0.333333
			t Critical one-tail	2.91999
			P(T<=t) two-tail	0.666667
			t Critical two-tail	4.30265
Replicate #	10E35 before dark shift	4A+ before dark shift	t-Test: Paired Two Sample for Means
1	8.3	8.9
2	8.4	8.9		10E35 before dark shift	4A+ before dark shift
3	8.3	8.8	Mean	8.33333	8.86667
			Variance	0.00333333	0.00333333
			Observations	3	3
			Pearson Correlation	0.5
			Hypothesized Mean Difference	0
			df	2
			t Stat	-16
			P(T<=t) one-tail	0.00194175
			t Critical one-tail	2.91999
			P(T<=t) two-tail	0.00388351
			t Critical two-tail	4.30265
Replicate #	10E35 after 15 minutes of dark exposure	4A+ after 15 minutes of dark exposure	t-Test: Paired Two Sample for Means
1	7.4	8.7
2	7.3	8.8		10E35 after 15 minutes of dark exposure	4A+ after 15 minutes of dark exposure
3	7.4	8.7	Mean	7.36667	8.73333
			Variance	0.00333333	0.00333333
			Observations	3	3
			Pearson Correlation	-1
			Hypothesized Mean Difference	0
			df	2
			t Stat	-20.5
			P(T<=t) one-tail	0.00118554
			t Critical one-tail	2.91999
			P(T<=t) two-tail	0.00237108
			t Critical two-tail	4.30265
Replicate #	10E35 after 30 minutes of dark exposure	4A+ after 30 minutes of dark exposure	t-Test: Paired Two Sample for Means
1	6.9	8.6
2	7	8.5		10E35 after 30 minutes of dark exposure	4A+ after 30 minutes of dark exposure
3	6.9	8.5	Mean	6.93333	8.53333
			Variance	0.00333333	0.00333333
			Observations	3	3
			Pearson Correlation	-0.5
			Hypothesized Mean Difference	0
			df	2
			t Stat	-27.7128
			P(T<=t) one-tail	0.000649773
			t Critical one-tail	2.91999
			P(T<=t) two-tail	0.00129955
			t Critical two-tail	4.30265
Replicate #	10E35 after 45 minutes of dark exposure	4A+ after 45 minutes of dark exposure	t-Test: Paired Two Sample for Means
1	6.8	8.5
2	6.7	8.6		10E35 after 45 minutes of dark exposure	4A+ after 45 minutes of dark exposure
3	6.7	8.5	Mean	6.73333	8.53333
			Variance	0.00333333	0.00333333
			Observations	3	3
			Pearson Correlation	-0.5
			Hypothesized Mean Difference	0
			df	2
			t Stat	-31.1769
			P(T<=t) one-tail	0.000513611
			t Critical one-tail	2.91999
			P(T<=t) two-tail	0.00102722
			t Critical two-tail	4.30265
Replicate #	10E35 after 1 hour of dark exposure	4A+ after 1 hour of dark exposure	t-Test: Paired Two Sample for Means
1	6.5	8.5
2	6.5	8.3		10E35 after 1 hour of dark exposure	4A+ after 1 hour of dark exposure
3	6.4	8.4	Mean	6.46667	8.4
			Variance	0.00333333	0.01
			Observations	3	3
			Pearson Correlation	0
			Hypothesized Mean Difference	0
			df	2
			t Stat	-29
			P(T<=t) one-tail	0.000593472
			t Critical one-tail	2.91999
			P(T<=t) two-tail	0.00118694
			t Critical two-tail	4.30265

## Sheet: Fig. 9
pH indicator used: phenol red
pH measured with a pH meter.
Three biological replicates were used in the experiment; each had three internal replicates. The average of three internal replicates is shown in the data.
Tap water used
Replicate #	Control before light shift	Control after 30 minutes of light exposure	t-Test: Paired Two Sample for Means
1	7.3	7.3
2	7.4	7.3		Control before light shift	Control after 30 minutes of light exposure
3	7.3	7.3	Mean	7.33333	7.3
			Variance	0.00333333	0
			Observations	3	3
			Pearson Correlation	#DIV/0!
			Hypothesized Mean Difference	0
			df	2
			t Stat	1
			P(T<=t) one-tail	0.211325
			t Critical one-tail	2.91999
			P(T<=t) two-tail	0.42265
			t Critical two-tail	4.30265
Replicate #	Control before light shift	Control after 1 hour of light exposure	t-Test: Paired Two Sample for Means
1	7.3	7.4
2	7.4	7.4		Control before light shift	Control after 1 hour of light exposure
3	7.3	7.3	Mean	7.33333	7.36667
			Variance	0.00333333	0.00333333
			Observations	3	3
			Pearson Correlation	0.5
			Hypothesized Mean Difference	0
			df	2
			t Stat	-1
			P(T<=t) one-tail	0.211325
			t Critical one-tail	2.91999
			P(T<=t) two-tail	0.42265
			t Critical two-tail	4.30265
Replicate #	Control before light shift	Control after 2 hours of light exposure	t-Test: Paired Two Sample for Means
1	7.3	7.2
2	7.4	7.3		Control before light shift	Control after 2 hours of light exposure
3	7.3	7.3	Mean	7.33333	7.26667
			Variance	0.00333333	0.00333333
			Observations	3	3
			Pearson Correlation	0.5
			Hypothesized Mean Difference	0
			df	2
			t Stat	2
			P(T<=t) one-tail	0.0917517
			t Critical one-tail	2.91999
			P(T<=t) two-tail	0.183503
			t Critical two-tail	4.30265
Replicate #	Control before light shift	Control after 3 hours of light exposure	t-Test: Paired Two Sample for Means
1	7.3	7.3
2	7.4	7.2		Control before light shift	Control after 3 hours of light exposure
3	7.3	7.1	Mean	7.33333	7.2
			Variance	0.00333333	0.01
			Observations	3	3
			Pearson Correlation	2.55393e-15
			Hypothesized Mean Difference	0
			df	2
			t Stat	2
			P(T<=t) one-tail	0.0917517
			t Critical one-tail	2.91999
			P(T<=t) two-tail	0.183503
			t Critical two-tail	4.30265
Replicate #	Control before light shift	Control after 48 hours of light exposure	t-Test: Paired Two Sample for Means
1	7.3	7.3
2	7.4	7.3		Control before light shift	Control after 48 hours of light exposure
3	7.3	7.3	Mean	7.33333	7.3
			Variance	0.00333333	0
			Observations	3	3
			Pearson Correlation	#DIV/0!
			Hypothesized Mean Difference	0
			df	2
			t Stat	1
			P(T<=t) one-tail	0.211325
			t Critical one-tail	2.91999
			P(T<=t) two-tail	0.42265
			t Critical two-tail	4.30265
Replicate #	10E35 before light shift	4A+ before light shift	t-Test: Paired Two Sample for Means
1	6	6.2
2	6	6.3		10E35 before light shift	4A+ before light shift
3	5.9	6.3	Mean	5.96667	6.26667
			Variance	0.00333333	0.00333333
			Observations	3	3
			Pearson Correlation	-0.5
			Hypothesized Mean Difference	0
			df	2
			t Stat	-5.19615
			P(T<=t) one-tail	0.0175494
			t Critical one-tail	2.91999
			P(T<=t) two-tail	0.0350987
			t Critical two-tail	4.30265
Replicate #	10E35 after 30 minutes of light exposure	4A+ after 30 minutes of light exposure	t-Test: Paired Two Sample for Means
1	6	6.4
2	6	6.5		10E35 after 30 minutes of light exposure	4A+ after 30 minutes of light exposure
3	6	6.5	Mean	6	6.46667
			Variance	0	0.00333333
			Observations	3	3
			Pearson Correlation	#DIV/0!
			Hypothesized Mean Difference	0
			df	2
			t Stat	-14
			P(T<=t) one-tail	0.00253166
			t Critical one-tail	2.91999
			P(T<=t) two-tail	0.00506332
			t Critical two-tail	4.30265
Replicate #	10E35 after 1 hour of light exposure	4A+ after 1 hour of light exposure	t-Test: Paired Two Sample for Means
1	6.1	6.8
2	6.2	6.9		10E35 after 1 hour of light exposure	4A+ after 1 hour of light exposure
3	6.2	6.8	Mean	6.16667	6.83333
			Variance	0.00333333	0.00333333
			Observations	3	3
			Pearson Correlation	0.5
			Hypothesized Mean Difference	0
			df	2
			t Stat	-20
			P(T<=t) one-tail	0.00124533
			t Critical one-tail	2.91999
			P(T<=t) two-tail	0.00249066
			t Critical two-tail	4.30265
Replicate #	10E35 after 2 hours of light exposure	4A+ after 2 hours of light exposure	t-Test: Paired Two Sample for Means
1	6.2	7.4
2	6.2	7.3		10E35 after 2 hours of light exposure	4A+ after 2 hours of light exposure
3	6.2	7.4	Mean	6.2	7.36667
			Variance	0	0.00333333
			Observations	3	3
			Pearson Correlation	#DIV/0!
			Hypothesized Mean Difference	0
			df	2
			t Stat	-35
			P(T<=t) one-tail	0.000407664
			t Critical one-tail	2.91999
			P(T<=t) two-tail	0.000815328
			t Critical two-tail	4.30265
Replicate #	10E35 after 3 hours of light exposure	4A+ after 3 hours of light exposure	t-Test: Paired Two Sample for Means
1	6.2	8.4
2	6.2	8.4		10E35 after 3 hours of light exposure	4A+ after 3 hours of light exposure
3	6.3	8.3	Mean	6.23333	8.36667
			Variance	0.00333333	0.00333333
			Observations	3	3
			Pearson Correlation	-1
			Hypothesized Mean Difference	0
			df	2
			t Stat	-32
			P(T<=t) one-tail	0.000487567
			t Critical one-tail	2.91999
			P(T<=t) two-tail	0.000975134
			t Critical two-tail	4.30265
Replicate #	10E35 after 48 hours of light exposure	4A+ after 48 hours of light exposure	t-Test: Paired Two Sample for Means
1	6.4	8.4
2	6.5	8.5		10E35 after 48 hours of light exposure	4A+ after 48 hours of light exposure
3	6.4	8.5	Mean	6.43333	8.46667
			Variance	0.00333333	0.00333333
			Observations	3	3
			Pearson Correlation	0.5
			Hypothesized Mean Difference	0
			df	2
			t Stat	-61
			P(T<=t) one-tail	0.000134318
			t Critical one-tail	2.91999
			P(T<=t) two-tail	0.000268637
			t Critical two-tail	4.30265
Replicate #	10E35 after 48 hours of light exposure	10E35 before light shift	t-Test: Paired Two Sample for Means
1	6.4	6
2	6.5	6		10E35 after 48 hours of light exposure	10E35 before light shift
3	6.4	5.9	Mean	6.43333	5.96667
			Variance	0.00333333	0.00333333
			Observations	3	3
			Pearson Correlation	0.5
			Hypothesized Mean Difference	0
			df	2
			t Stat	14
			P(T<=t) one-tail	0.00253166
			t Critical one-tail	2.91999
			P(T<=t) two-tail	0.00506332
			t Critical two-tail	4.30265
