# Supplementary material for: Engaging inexpensive hands-on activities using Chlamydomonas reinhardtii (a green micro-alga) beads to teach the interplay of photosynthesis and cellular respiration to K4–K16 Biology students
Source: PeerJ. 2020 Aug 25;8:e9817. doi: 10.7717/peerj.9817 (PMC7453928; doi:10.7717/peerj.9817)
Supplement: Data S2 — file contains the raw pH data with mean and standard deviation information from the experiments described in the following figures: Fig. 1, Fig. 2, Fig. 3, Fig. 6, Fig. 7, Fig. 8 & Fig. 9. Data analyses is based on three biological replicates. Each Biological replicate had three internal replicates. [file peerj-08-9817-s007.xlsx]

## Sheet: Fig. 1
Samples	Rep 1 pH	Rep 2 pH	Rep 3 pH	Average	STDEV
Control, light, DI water	7.1	7.2	7.2	7.16667	0.057735
4A+ beads, light, DI water	7.1	7.1	7.2	7.13333	0.057735
Control, dark, DI water	7.2	7.2	7.2	7.2	0
4A+ beads, dark, DI water	7.1	7.1	7.2	7.13333	0.057735
Control, light, tap water	7.3	7.2	7.3	7.26667	0.057735
4A+ beads, light, tap water	8.5	8.3	8.4	8.4	0.1
Control, dark, tap water	7.3	7.3	7.2	7.26667	0.057735
4A+ beads, dark, tap water	6.5	6.4	6.4	6.43333	0.057735
DI= de-ionized water
pH indicator used: phenol red
pH measured using a pH meter
Three biological replicates were used in the experiment; each had three internal replicates. The average of three internal replicates is shown in the data.

## Sheet: Fig.2
Samples	Rep 1 pH	Rep 2 pH	Rep 3 pH	Average	STDEV
Control for 4A+ 4 x 106 cells/bead set, light	7	7	7	7	0
4A+ 4 x 106 cells/bead, light	6.2	6.2	6.1	6.16667	0.057735
Control for 4A+ 4 x 106 cells/bead set, dark	7.2	7.1	7	7.1	0.1
4A+ 4 x 106 cells/bead; dark	6.1	6	6.1	6.06667	0.057735
Control for 4A+ 2 x 106 cells/bead set, light	7.2	7.3	7	7.16667	0.152753
4A+ 2 x 106 cells/bead, light	8.4	8.5	8.4	8.43333	0.057735
Control for 4A+ 2 x 106 cells/bead, dark	7.1	7.2	7.1	7.13333	0.057735
4A+ 2 x 106 cells/bead, dark	6.5	6.5	6.4	6.46667	0.057735
pH indicator used: phenol red
pH measured using a pH meter
Three biological replicates were used in the experiment; each had three internal replicates. The average of three internal replicates is shown in the data.
Tap water used

## Sheet: Fig. 3
Samples	Rep 1 pH	Rep 2 pH	Rep 3 pH	Average	STDEV
Control bracelet	7	7	7	7	0
Dark-exposed 4A+ algal bracelet	6	6.5	6	6.16667	0.235702
Light-exposed 4A+ algal bracelet	8.5	9	9	8.83333	0.235702
pH indicator used: bicarbonate indicator
pH measured using pH testing strips
Three biological replicates were used in the experiment; each had three internal replicates. The average of three internal replicates is shown in the data.
Tap water used

## Sheet: Fig.6
Samples	Rep 1 pH	Rep 2 pH	Rep 3 pH	Average	STDEV
9 hour-dark-exposed 4A+ algal bracelet	6	6	6	6	0
9 hour-dark-exposed 4A+ algal bracelet exposed to light for four hours	8.5	8.5	9	8.66667	0.235702
15 hour-dark-exposed 4A+ algal bracelet	6	5.5	5	5.5	0.408248
9 hour-dark-exposed 4A+ algal bracelet exposed to light for 12 hours	6	6.5	6.5	6.33333	0.235702
pH indicator used: bicarbonate indicator
Three biological replicates were used in the experiment; each had three internal replicates. The average of three internal replicates is shown in the data.
pH measured using pH testing strips
Tap water used

## Sheet: Fig.7
Samples	Rep 1 pH	Rep 2 pH	Rep 3 pH	Average	STDEV
Control before light shift	7.3	7.3	7.2	7.26667	0.057735
10E35 before light shift	6.7	6.7	6.8	6.73333	0.057735
4A+ before light shift	7	7.2	7.1	7.1	0.1
Control after 30 minutes of light exposure	7.3	7.2	7.2	7.23333	0.057735
10E35 after 30 minutes of light exposure	6.9	6.9	6.8	6.86667	0.057735
4A+ after 30 minutes of light exposure	7.6	7.6	7.7	7.63333	0.057735
Control after 1 hour of light exposure	7.3	7.4	7.3	7.33333	0.057735
10E35 after 1 hour of light exposure	7.5	7.6	7.6	7.56667	0.057735
4A+ after 1 hour of light exposure	8.7	8.8	8.8	8.76667	0.057735
Control before dark shift	7.2	7.3	7.1	7.2	0.1
10E35 before dark shift	6.7	6.8	6.9	6.8	0.1
4A+ before dark shift	7	7.1	7.1	7.06667	0.057735
Control after 30 minutes of dark exposure	7	7.2	7.1	7.1	0.1
10E35 after 30 minutes of dark exposure	6.5	6.5	6.6	6.53333	0.057735
4A+ after 30 minutes of dark exposure	7	7	6.9	6.96667	0.057735
Control after 1 hour of dark exposure	7.1	7.1	7.2	7.13333	0.057735
10E35 after 1 hour of dark exposure	6.4	6.3	6.3	6.33333	0.057735
4A+ after 1 hour of dark exposure	6.8	6.7	6.8	6.76667	0.057735
pH indicator used: phenol red
pH measured using a pH meter
Three biological replicates were used in the experiment; each had three internal replicates. The average of three internal replicates is shown in the data.
Tap water used

## Sheet: Fig. 8
Samples	Rep 1 pH	Rep 2 pH	Rep 3 pH	Average	STDEV
Control before dark shift	7.3	7.4	7.4	7.36667	0.057735
10E35 before dark shift	8.3	8.4	8.3	8.33333	0.057735
4A+ before dark shift	8.9	8.9	8.8	8.86667	0.057735
Control after 15 minutes of dark exposure	7.4	7.3	7.3	7.33333	0.057735
10E35 after 15 minutes of dark exposure	7.4	7.3	7.4	7.36667	0.057735
4A+ after 15 minutes of dark exposure	8.7	8.8	8.7	8.73333	0.057735
Control after 30 minutes of dark exposure	7.4	7.4	7.3	7.36667	0.057735
10E35 after 30 minutes of dark exposure	6.9	7	6.9	6.93333	0.057735
4A+ after 30 minutes of dark exposure	8.6	8.5	8.5	8.53333	0.057735
Control after 45 minutes of dark exposure	7.4	7.3	7.3	7.33333	0.057735
10E35 after 45 minutes of dark exposure	6.8	6.7	6.7	6.73333	0.057735
4A+ after 45 minutes of dark exposure	8.5	8.6	8.5	8.53333	0.057735
Control after 1 hour of dark exposure	7.4	7.3	7.3	7.33333	0.057735
10E35 after 1 hour of dark exposure	6.5	6.5	6.4	6.46667	0.057735
4A+ after 1 hour of dark exposure	8.5	8.3	8.4	8.4	0.1
pH indicator used: phenol red
pH measured using a pH meter
Three biological replicates were used in the experiment; each had three internal replicates. The average of three internal replicates is shown in the data.
Tap water used

## Sheet: Fig. 9
Samples	Rep 1 pH	Rep 2 pH	Rep 3 pH	Average	STDEV
Control before light shift	7.3	7.4	7.3	7.33333	0.057735
10E35 before light shift	6	6	5.9	5.96667	0.057735
4A+ before light shift	6.2	6.3	6.3	6.26667	0.057735
Control after 30 minutes of light exposure	7.3	7.3	7.3	7.3	0
10E35 after 30 minutes of light exposure	6	6	6	6	0
4A+ after 30 minutes of light exposure	6.4	6.5	6.5	6.46667	0.057735
Control after 1 hour of light exposure	7.4	7.4	7.3	7.36667	0.057735
10E35 after 1 hour of light exposure	6.1	6.2	6.2	6.16667	0.057735
4A+ after 1 hour of light exposure	6.8	6.9	6.8	6.83333	0.057735
Control after 2 hours of light exposure	7.2	7.3	7.3	7.26667	0.057735
10E35 after 2 hours of light exposure	6.2	6.2	6.2	6.2	0
4A+ after 2 hours of light exposure	7.4	7.3	7.4	7.36667	0.057735
Control after 3 hours of light exposure	7.3	7.2	7.1	7.2	0.1
10E35 after 3 hours of light exposure	6.2	6.2	6.3	6.23333	0.057735
4A+ after 3 hours of light exposure	8.4	8.4	8.3	8.36667	0.057735
Control after 48 hours of light exposure	7.3	7.3	7.3	7.3	0
10E35 after 48 hours of light exposure	6.4	6.5	6.4	6.43333	0.057735
4A+ after 48 hours of light exposure	8.4	8.5	8.5	8.46667	0.057735
pH indicator used: phenol red
pH measured using a pH meter
Three biological replicates were used in the experiment; each had three internal replicates. The average of three internal replicates is shown in the data.
Tap water used
